# Supplementary material
Source: publisher figshare collection journal article supplement (https://acs.figshare.com/ndownloader/files/5076514)
Supplement: Supplementary file 1 [file 5076514]

COMPOUND 3A

data_real2
 
_audit_creation_method            SHELXL-97
_chemical_name_systematic
;
 ?
;
_chemical_name_common             ?
_chemical_melting_point           ?
_chemical_formula_moiety          ?
_chemical_formula_sum
 'C30 H23 N2 O Re S4'
_chemical_formula_weight          741.94
 
loop_
 _atom_type_symbol
 _atom_type_description
 _atom_type_scat_dispersion_real
 _atom_type_scat_dispersion_imag
 _atom_type_scat_source
 'C'  'C'   0.0033   0.0016
 'International Tables Vol C Tables 4.2.6.8 and 6.1.1.4'
 'H'  'H'   0.0000   0.0000
 'International Tables Vol C Tables 4.2.6.8 and 6.1.1.4'
 'N'  'N'   0.0061   0.0033
 'International Tables Vol C Tables 4.2.6.8 and 6.1.1.4'
 'O'  'O'   0.0106   0.0060
 'International Tables Vol C Tables 4.2.6.8 and 6.1.1.4'
 'S'  'S'   0.1246   0.1234
 'International Tables Vol C Tables 4.2.6.8 and 6.1.1.4'
 'Re'  'Re'  -1.0185   7.2310
 'International Tables Vol C Tables 4.2.6.8 and 6.1.1.4'
 
_symmetry_cell_setting            'monoclinic'
_symmetry_space_group_name_H-M    P21/c
 
loop_
 _symmetry_equiv_pos_as_xyz
 'x, y, z'
 'x, -y+1/2, z+1/2'
 '-x, -y, -z'
 '-x, y-1/2, -z-1/2'
 
_cell_length_a                    15.588(6)
_cell_length_b                    9.973(4)
_cell_length_c                    19.202(7)
_cell_angle_alpha                 90.00
_cell_angle_beta                  104.27(1)
_cell_angle_gamma                 90.00
_cell_volume                      2893.0(2)
_cell_formula_units_Z             4
_cell_measurement_temperature     298
_cell_measurement_reflns_used     25
_cell_measurement_theta_min       5.6
_cell_measurement_theta_max       11.6
 
_exptl_crystal_description        'rhombic'
_exptl_crystal_colour             'brown'
_exptl_crystal_size_max           0.50
_exptl_crystal_size_mid           0.25
_exptl_crystal_size_min           0.15
_exptl_crystal_density_meas       1.69
_exptl_crystal_density_diffrn     1.703
_exptl_crystal_density_method     'floating method'
_exptl_crystal_F_000              1456
_exptl_absorpt_coefficient_mu     4.516
_exptl_absorpt_correction_type    'psi-scan empirical'
_exptl_absorpt_correction_T_min   0.70
_exptl_absorpt_correction_T_max   1.00
_exptl_absorpt_process_details    ?
 
_exptl_special_details
;
 ?
;
 
_diffrn_ambient_temperature       298
_diffrn_radiation_wavelength      0.71073
_diffrn_radiation_type            MoK\a
_diffrn_radiation_source          'fine-focus sealed tube'
_diffrn_radiation_monochromator   graphite
_diffrn_measurement_device_type   'Crystal Logic Dual Goniometer'
_diffrn_measurement_method        '\2/2\q'
_diffrn_detector_area_resol_mean  ?
_diffrn_standards_number          3
_diffrn_standards_interval_count  97
_diffrn_standards_interval_time   ?
_diffrn_standards_decay_%         0.8
_diffrn_reflns_number             5261
_diffrn_reflns_av_R_equivalents   0.0157
_diffrn_reflns_av_sigmaI/netI     0.0448
_diffrn_reflns_limit_h_min        -18
_diffrn_reflns_limit_h_max        17
_diffrn_reflns_limit_k_min        -11
_diffrn_reflns_limit_k_max        0
_diffrn_reflns_limit_l_min        0
_diffrn_reflns_limit_l_max        22
_diffrn_reflns_theta_min          1.35
_diffrn_reflns_theta_max          25.03
_reflns_number_total              5094
_reflns_number_gt                 4580
_reflns_threshold_expression      >2sigma(I)
 
_computing_data_collection        ?
_computing_cell_refinement        ?
_computing_data_reduction         ?
_computing_structure_solution     'SHELXS-86 (Sheldrick, 1986)'
_computing_structure_refinement   'SHELXL-97 (Sheldrick, 1997)'
_computing_molecular_graphics     ?
_computing_publication_material   ?
 
_refine_special_details
;
 Refinement of F^2^ against ALL reflections.  The weighted R-factor wR and
 goodness of fit S are based on F^2^, conventional R-factors R are based
 on F, with F set to zero for negative F^2^. The threshold expression of
 F^2^ > 2sigma(F^2^) is used only for calculating R-factors(gt) etc. and is
 not relevant to the choice of reflections for refinement.  R-factors based
 on F^2^ are statistically about twice as large as those based on F, and R-
 factors based on ALL data will be even larger.
;
 
_refine_ls_structure_factor_coef  Fsqd
_refine_ls_matrix_type            full
_refine_ls_weighting_scheme       calc
_refine_ls_weighting_details
 'calc w=1/[\s^2^(Fo^2^)+(0.0178P)^2^+12.3285P] where P=(Fo^2^+2Fc^2^)/3'
_atom_sites_solution_primary      direct
_atom_sites_solution_secondary    difmap
_atom_sites_solution_hydrogens    geom
_refine_ls_hydrogen_treatment     mixed
_refine_ls_extinction_method      none
_refine_ls_extinction_coef        ?
_refine_ls_number_reflns          5094
_refine_ls_number_parameters      429
_refine_ls_number_restraints      0
_refine_ls_R_factor_all           0.0444
_refine_ls_R_factor_gt            0.0393
_refine_ls_wR_factor_ref          0.1015
_refine_ls_wR_factor_gt           0.0982
_refine_ls_goodness_of_fit_ref    1.113
_refine_ls_restrained_S_all       1.113
_refine_ls_shift/su_max           0.006
_refine_ls_shift/su_mean          0.000
 
loop_
 _atom_site_label
 _atom_site_type_symbol
 _atom_site_fract_x
 _atom_site_fract_y
 _atom_site_fract_z
 _atom_site_U_iso_or_equiv
 _atom_site_adp_type
 _atom_site_occupancy
 _atom_site_symmetry_multiplicity
 _atom_site_calc_flag
 _atom_site_refinement_flags
 _atom_site_disorder_assembly
 _atom_site_disorder_group
Re Re 0.265754(17) 0.04689(3) 0.145901(14) 0.04657(11) Uani 1 1 d . . .
O1 O 0.3488(3) 0.1353(5) 0.1988(3) 0.0628(12) Uani 1 1 d . . .
N1 N 0.1538(4) -0.1089(6) 0.0990(3) 0.0534(13) Uani 1 1 d . . .
N2 N 0.2642(4) -0.1027(6) 0.2266(3) 0.0489(12) Uani 1 1 d . . .
S2 S 0.22210(12) 0.17517(18) 0.04302(10) 0.0549(4) Uani 1 1 d . . .
S3 S 0.14113(12) 0.16144(18) 0.16948(10) 0.0570(4) Uani 1 1 d . . .
S4 S 0.34102(13) -0.09823(19) 0.08402(11) 0.0606(5) Uani 1 1 d . . .
C1 C 0.0987(5) -0.1086(9) 0.0334(4) 0.0604(18) Uani 1 1 d . . .
C2 C 0.0320(6) -0.1983(9) 0.0100(5) 0.075(2) Uani 1 1 d . . .
C3 C 0.0228(7) -0.3007(11) 0.0579(6) 0.088(3) Uani 1 1 d . . .
C4 C 0.0796(5) -0.3054(9) 0.1234(5) 0.072(2) Uani 1 1 d . . .
H4 H 0.0759 -0.3740 0.1554 0.13(4) Uiso 1 1 calc R . .
C5 C 0.1435(5) -0.2070(7) 0.1424(4) 0.0580(17) Uani 1 1 d . . .
C6 C 0.2075(4) -0.2029(6) 0.2127(4) 0.0492(15) Uani 1 1 d . . .
C7 C 0.3164(4) -0.1131(8) 0.2962(4) 0.0555(17) Uani 1 1 d . . .
C8 C 0.3819(5) -0.0227(10) 0.3314(4) 0.067(2) Uani 1 1 d . . .
C9 C 0.4233(8) -0.0516(13) 0.4013(5) 0.096(3) Uani 1 1 d . . .
C10 C 0.4038(8) -0.1617(13) 0.4381(6) 0.098(3) Uani 1 1 d . . .
C11 C 0.3410(7) -0.2490(11) 0.4042(5) 0.080(2) Uani 1 1 d . . .
C12 C 0.2962(5) -0.2268(8) 0.3343(4) 0.0610(18) Uani 1 1 d . . .
S1 S 0.21166(15) -0.3162(2) 0.28003(12) 0.0702(5) Uani 1 1 d . . .
C13 C 0.2865(5) 0.1525(7) -0.0208(4) 0.0549(16) Uani 1 1 d . . .
C14 C 0.2432(6) 0.1409(8) -0.0928(4) 0.066(2) Uani 1 1 d . . .
C15 C 0.2903(8) 0.1329(10) -0.1448(5) 0.083(3) Uani 1 1 d . . .
C16 C 0.3813(8) 0.1312(10) -0.1244(6) 0.089(3) Uani 1 1 d . . .
C17 C 0.4246(7) 0.1390(10) -0.0542(6) 0.084(3) Uani 1 1 d . . .
C18 C 0.3778(5) 0.1530(9) -0.0019(5) 0.067(2) Uani 1 1 d . . .
C19 C 0.1000(5) 0.0662(7) 0.2325(4) 0.0573(17) Uani 1 1 d . . .
C20 C 0.1442(6) 0.0597(8) 0.3037(5) 0.0631(19) Uani 1 1 d . . .
C21 C 0.1119(7) -0.0187(10) 0.3520(6) 0.080(3) Uani 1 1 d . . .
C22 C 0.0344(8) -0.0901(11) 0.3268(7) 0.088(3) Uani 1 1 d . . .
C23 C -0.0115(7) -0.0811(11) 0.2575(7) 0.090(3) Uani 1 1 d . . .
C24 C 0.0203(6) -0.0042(9) 0.2093(6) 0.071(2) Uani 1 1 d . . .
C25 C 0.3523(5) -0.2606(7) 0.1248(4) 0.0605(18) Uani 1 1 d . . .
C26 C 0.4138(6) -0.2859(9) 0.1897(5) 0.068(2) Uani 1 1 d . . .
C27 C 0.4212(10) -0.4119(14) 0.2167(9) 0.091(4) Uani 1 1 d . . .
C28 C 0.3730(9) -0.5156(11) 0.1828(8) 0.102(4) Uani 1 1 d . . .
H28 H 0.3802 -0.6008 0.2031 0.13(4) Uiso 1 1 calc R . .
C29 C 0.3146(10) -0.4951(11) 0.1197(8) 0.100(3) Uani 1 1 d . . .
C30 C 0.3038(7) -0.3648(10) 0.0906(6) 0.083(3) Uani 1 1 d . . .
H1 H 0.107(4) -0.046(7) 0.006(4) 0.043(19) Uiso 1 1 d . . .
H2 H 0.001(6) -0.187(9) -0.038(5) 0.08(3) Uiso 1 1 d . . .
H3 H -0.007(7) -0.356(11) 0.033(6) 0.11(4) Uiso 1 1 d . . .
H8 H 0.395(5) 0.055(7) 0.307(4) 0.052(19) Uiso 1 1 d . . .
H9 H 0.467(8) 0.012(12) 0.423(6) 0.11(4) Uiso 1 1 d . . .
H10 H 0.428(8) -0.168(13) 0.488(7) 0.15(5) Uiso 1 1 d . . .
H11 H 0.321(6) -0.331(9) 0.426(5) 0.09(3) Uiso 1 1 d . . .
H14 H 0.181(5) 0.150(7) -0.105(4) 0.06(2) Uiso 1 1 d . . .
H15 H 0.261(5) 0.124(8) -0.195(4) 0.07(2) Uiso 1 1 d . . .
H16 H 0.417(7) 0.122(11) -0.160(6) 0.12(4) Uiso 1 1 d . . .
H17 H 0.488(6) 0.133(8) -0.042(4) 0.07(2) Uiso 1 1 d . . .
H18 H 0.406(4) 0.157(7) 0.046(4) 0.051(19) Uiso 1 1 d . . .
H20 H 0.192(4) 0.106(7) 0.320(3) 0.039(17) Uiso 1 1 d . . .
H21 H 0.146(6) -0.013(9) 0.402(5) 0.08(3) Uiso 1 1 d . . .
H22 H 0.023(7) -0.143(11) 0.364(6) 0.11(3) Uiso 1 1 d . . .
H23 H -0.070(8) -0.133(13) 0.236(7) 0.15(5) Uiso 1 1 d . . .
H24 H -0.011(6) -0.005(9) 0.158(5) 0.09(3) Uiso 1 1 d . . .
H26 H 0.448(6) -0.215(9) 0.216(5) 0.08(3) Uiso 1 1 d . . .
H27 H 0.447(4) -0.426(7) 0.241(3) 0.012(18) Uiso 1 1 d . . .
H29 H 0.267(6) -0.548(8) 0.089(4) 0.07(2) Uiso 1 1 d . . .
H30 H 0.264(5) -0.355(8) 0.048(4) 0.07(3) Uiso 1 1 d . . .
 
loop_
 _atom_site_aniso_label
 _atom_site_aniso_U_11
 _atom_site_aniso_U_22
 _atom_site_aniso_U_33
 _atom_site_aniso_U_23
 _atom_site_aniso_U_13
 _atom_site_aniso_U_12
Re 0.04653(16) 0.04145(16) 0.05426(17) -0.00033(11) 0.01722(12) -0.00463(11)
O1 0.068(3) 0.054(3) 0.067(3) 0.006(2) 0.016(2) -0.007(2)
N1 0.050(3) 0.055(3) 0.054(3) -0.006(3) 0.010(3) -0.005(3)
N2 0.046(3) 0.054(3) 0.046(3) -0.001(2) 0.011(2) 0.001(3)
S2 0.0525(9) 0.0534(10) 0.0597(10) 0.0054(8) 0.0159(8) -0.0012(8)
S3 0.0576(10) 0.0510(10) 0.0670(11) -0.0022(8) 0.0240(8) 0.0029(8)
S4 0.0648(11) 0.0531(10) 0.0734(12) 0.0022(9) 0.0350(9) 0.0017(8)
C1 0.058(4) 0.064(5) 0.054(4) 0.000(4) 0.004(3) -0.008(4)
C2 0.069(5) 0.079(6) 0.066(5) -0.006(4) -0.002(4) -0.011(4)
C3 0.077(6) 0.089(7) 0.091(7) -0.013(6) 0.004(5) -0.030(5)
C4 0.069(5) 0.063(5) 0.079(5) 0.001(4) 0.008(4) -0.022(4)
C5 0.054(4) 0.049(4) 0.072(5) -0.002(3) 0.017(3) -0.007(3)
C6 0.047(3) 0.045(4) 0.057(4) 0.002(3) 0.016(3) -0.008(3)
C7 0.045(4) 0.067(4) 0.055(4) -0.003(3) 0.012(3) 0.010(3)
C8 0.060(5) 0.087(6) 0.047(4) 0.007(4) -0.001(3) -0.013(4)
C9 0.087(7) 0.125(9) 0.061(5) 0.004(6) -0.010(5) -0.019(7)
C10 0.098(8) 0.119(9) 0.064(6) 0.018(6) -0.005(5) 0.001(7)
C11 0.091(6) 0.087(6) 0.056(5) 0.013(5) 0.009(4) 0.011(5)
C12 0.061(4) 0.063(4) 0.059(4) 0.009(4) 0.014(3) 0.008(4)
S1 0.0800(13) 0.0597(11) 0.0702(12) 0.0138(9) 0.0172(10) -0.0083(10)
C13 0.059(4) 0.045(4) 0.063(4) 0.004(3) 0.021(3) -0.005(3)
C14 0.073(5) 0.063(5) 0.058(4) 0.005(4) 0.007(4) -0.001(4)
C15 0.121(9) 0.071(6) 0.060(5) -0.009(4) 0.025(5) -0.008(6)
C16 0.114(9) 0.076(6) 0.094(7) -0.009(5) 0.058(7) -0.011(6)
C17 0.071(6) 0.087(6) 0.107(8) -0.001(6) 0.044(6) -0.012(5)
C18 0.059(4) 0.075(5) 0.067(5) 0.004(4) 0.017(4) -0.013(4)
C19 0.056(4) 0.050(4) 0.072(5) -0.005(3) 0.028(4) 0.004(3)
C20 0.057(4) 0.066(5) 0.071(5) -0.010(4) 0.026(4) 0.000(4)
C21 0.087(7) 0.087(6) 0.074(6) 0.005(5) 0.033(5) 0.023(5)
C22 0.093(7) 0.079(6) 0.110(8) 0.022(6) 0.057(7) 0.007(5)
C23 0.076(6) 0.079(6) 0.123(9) 0.006(6) 0.043(6) -0.010(5)
C24 0.061(5) 0.071(5) 0.085(6) -0.003(5) 0.025(4) -0.004(4)
C25 0.062(4) 0.049(4) 0.081(5) -0.005(4) 0.035(4) 0.001(3)
C26 0.065(5) 0.057(5) 0.092(6) 0.004(4) 0.039(5) 0.002(4)
C27 0.089(9) 0.086(8) 0.109(11) 0.028(8) 0.046(8) 0.030(7)
C28 0.133(10) 0.051(6) 0.143(11) 0.003(6) 0.071(9) 0.010(6)
C29 0.120(10) 0.060(6) 0.126(10) -0.023(7) 0.041(8) -0.017(6)
C30 0.099(7) 0.065(6) 0.090(7) -0.012(5) 0.032(6) -0.009(5)
 
_geom_special_details
;
 All esds (except the esd in the dihedral angle between two l.s. planes)
 are estimated using the full covariance matrix.  The cell esds are taken
 into account individually in the estimation of esds in distances, angles
 and torsion angles; correlations between esds in cell parameters are only
 used when they are defined by crystal symmetry.  An approximate (isotropic)
 treatment of cell esds is used for estimating esds involving l.s. planes.
;
 
loop_
 _geom_bond_atom_site_label_1
 _geom_bond_atom_site_label_2
 _geom_bond_distance
 _geom_bond_site_symmetry_2
 _geom_bond_publ_flag
Re O1 1.685(5) . ?
Re N2 2.155(6) . ?
Re S2 2.3108(19) . ?
Re N1 2.344(6) . ?
Re S4 2.3601(19) . ?
Re S3 2.3912(19) . ?
N1 C5 1.321(9) . ?
N1 C1 1.339(9) . ?
N2 C6 1.317(8) . ?
N2 C7 1.386(8) . ?
S2 C13 1.779(7) . ?
S3 C19 1.778(8) . ?
S4 C25 1.789(8) . ?
C1 C2 1.360(11) . ?
C2 C3 1.406(14) . ?
C3 C4 1.350(13) . ?
C4 C5 1.381(10) . ?
C5 C6 1.468(10) . ?
C6 S1 1.706(7) . ?
C7 C8 1.405(11) . ?
C7 C12 1.425(10) . ?
C8 C9 1.370(12) . ?
C9 C10 1.379(16) . ?
C10 C11 1.351(15) . ?
C11 C12 1.370(11) . ?
C12 S1 1.715(8) . ?
C13 C18 1.380(10) . ?
C13 C14 1.385(10) . ?
C14 C15 1.381(13) . ?
C15 C16 1.375(15) . ?
C16 C17 1.352(15) . ?
C17 C18 1.386(12) . ?
C19 C20 1.372(11) . ?
C19 C24 1.401(11) . ?
C20 C21 1.399(13) . ?
C21 C22 1.383(15) . ?
C22 C23 1.350(16) . ?
C23 C24 1.384(14) . ?
C25 C30 1.356(12) . ?
C25 C26 1.395(12) . ?
C26 C27 1.354(15) . ?
C27 C28 1.348(19) . ?
C28 C29 1.340(17) . ?
C29 C30 1.408(15) . ?
 
loop_
 _geom_angle_atom_site_label_1
 _geom_angle_atom_site_label_2
 _geom_angle_atom_site_label_3
 _geom_angle
 _geom_angle_site_symmetry_1
 _geom_angle_site_symmetry_3
 _geom_angle_publ_flag
O1 Re N2 94.1(2) . . ?
O1 Re S2 104.24(17) . . ?
N2 Re S2 160.86(15) . . ?
O1 Re N1 165.3(2) . . ?
N2 Re N1 71.2(2) . . ?
S2 Re N1 90.23(15) . . ?
O1 Re S4 102.76(19) . . ?
N2 Re S4 91.87(15) . . ?
S2 Re S4 89.27(7) . . ?
N1 Re S4 79.37(15) . . ?
O1 Re S3 100.11(19) . . ?
N2 Re S3 92.34(15) . . ?
S2 Re S3 79.38(7) . . ?
N1 Re S3 80.02(15) . . ?
S4 Re S3 156.38(7) . . ?
C5 N1 C1 116.5(6) . . ?
C5 N1 Re 116.3(5) . . ?
C1 N1 Re 127.2(5) . . ?
C6 N2 C7 110.1(6) . . ?
C6 N2 Re 120.4(4) . . ?
C7 N2 Re 129.6(5) . . ?
C13 S2 Re 114.9(2) . . ?
C19 S3 Re 108.7(2) . . ?
C25 S4 Re 110.0(2) . . ?
N1 C1 C2 124.8(8) . . ?
C1 C2 C3 117.1(8) . . ?
C4 C3 C2 119.1(9) . . ?
C3 C4 C5 119.1(9) . . ?
N1 C5 C4 123.5(7) . . ?
N1 C5 C6 113.5(6) . . ?
C4 C5 C6 123.0(7) . . ?
N2 C6 C5 118.5(6) . . ?
N2 C6 S1 116.8(5) . . ?
C5 C6 S1 124.6(5) . . ?
N2 C7 C8 126.9(7) . . ?
N2 C7 C12 113.8(6) . . ?
C8 C7 C12 119.3(7) . . ?
C9 C8 C7 116.6(9) . . ?
C8 C9 C10 124.0(10) . . ?
C11 C10 C9 119.5(9) . . ?
C10 C11 C12 120.0(10) . . ?
C11 C12 C7 120.6(8) . . ?
C11 C12 S1 129.8(7) . . ?
C7 C12 S1 109.6(5) . . ?
C6 S1 C12 89.8(3) . . ?
C18 C13 C14 118.6(7) . . ?
C18 C13 S2 122.6(6) . . ?
C14 C13 S2 118.7(6) . . ?
C15 C14 C13 120.9(9) . . ?
C16 C15 C14 119.3(9) . . ?
C17 C16 C15 120.7(9) . . ?
C16 C17 C18 120.3(10) . . ?
C13 C18 C17 120.2(9) . . ?
C20 C19 C24 118.8(8) . . ?
C20 C19 S3 121.7(6) . . ?
C24 C19 S3 119.5(7) . . ?
C19 C20 C21 120.8(9) . . ?
C22 C21 C20 118.8(10) . . ?
C23 C22 C21 121.1(10) . . ?
C22 C23 C24 120.3(10) . . ?
C23 C24 C19 120.1(10) . . ?
C30 C25 C26 118.2(8) . . ?
C30 C25 S4 119.9(7) . . ?
C26 C25 S4 121.8(6) . . ?
C27 C26 C25 119.0(11) . . ?
C28 C27 C26 122.8(14) . . ?
C29 C28 C27 119.6(12) . . ?
C28 C29 C30 119.2(11) . . ?
C25 C30 C29 121.1(11) . . ?
 
_diffrn_measured_fraction_theta_max    0.997
_diffrn_reflns_theta_full              25.03
_diffrn_measured_fraction_theta_full   0.997
_refine_diff_density_max    0.801
_refine_diff_density_min   -0.848
_refine_diff_density_rms    0.110

#===END

COMPOUND 5B

data_real4
 
_audit_creation_method            SHELXL-97
_chemical_name_systematic
;
 ?
;
_chemical_name_common             ?
_chemical_melting_point           ?
_chemical_formula_moiety          ?
_chemical_formula_sum
 'C33 H29 N2 O4 Re S4'
_chemical_formula_weight          832.02
 
loop_
 _atom_type_symbol
 _atom_type_description
 _atom_type_scat_dispersion_real
 _atom_type_scat_dispersion_imag
 _atom_type_scat_source
 'C'  'C'   0.0033   0.0016
 'International Tables Vol C Tables 4.2.6.8 and 6.1.1.4'
 'H'  'H'   0.0000   0.0000
 'International Tables Vol C Tables 4.2.6.8 and 6.1.1.4'
 'N'  'N'   0.0061   0.0033
 'International Tables Vol C Tables 4.2.6.8 and 6.1.1.4'
 'O'  'O'   0.0106   0.0060
 'International Tables Vol C Tables 4.2.6.8 and 6.1.1.4'
 'S'  'S'   0.1246   0.1234
 'International Tables Vol C Tables 4.2.6.8 and 6.1.1.4'
 'Re'  'Re'  -1.0185   7.2310
 'International Tables Vol C Tables 4.2.6.8 and 6.1.1.4'
 
_symmetry_cell_setting            'tetragonal'
_symmetry_space_group_name_H-M    I41/a
 
loop_
 _symmetry_equiv_pos_as_xyz
 'x, y, z'
 '-x+1/2, -y, z+1/2'
 '-y+3/4, x+1/4, z+1/4'
 'y+3/4, -x+3/4, z+3/4'
 'x+1/2, y+1/2, z+1/2'
 '-x+1, -y+1/2, z+1'
 '-y+5/4, x+3/4, z+3/4'
 'y+5/4, -x+5/4, z+5/4'
 '-x, -y, -z'
 'x-1/2, y, -z-1/2'
 'y-3/4, -x-1/4, -z-1/4'
 '-y-3/4, x-3/4, -z-3/4'
 '-x+1/2, -y+1/2, -z+1/2'
 'x, y+1/2, -z'
 'y-1/4, -x+1/4, -z+1/4'
 '-y-1/4, x-1/4, -z-1/4'
 
_cell_length_a                    38.475(15)
_cell_length_b                    38.475(15)
_cell_length_c                    8.837(4)
_cell_angle_alpha                 90.00
_cell_angle_beta                  90.00
_cell_angle_gamma                 90.00
_cell_volume                      13082(9)
_cell_formula_units_Z             16
_cell_measurement_temperature     298
_cell_measurement_reflns_used     25
_cell_measurement_theta_min       5.3
_cell_measurement_theta_max       11.6
 
_exptl_crystal_description        'needle'
_exptl_crystal_colour             'red'
_exptl_crystal_size_max           0.50
_exptl_crystal_size_mid           0.05
_exptl_crystal_size_min           0.05
_exptl_crystal_density_meas       1.67
_exptl_crystal_density_diffrn     1.690
_exptl_crystal_density_method     'gloating method'
_exptl_crystal_F_000              6592
_exptl_absorpt_coefficient_mu     4.011
_exptl_absorpt_correction_type    'psi-scan empirical'
_exptl_absorpt_correction_T_min   0.91
_exptl_absorpt_correction_T_max   1.00
_exptl_absorpt_process_details    ?
 
_exptl_special_details
;
 ?
;
 
_diffrn_ambient_temperature       298
_diffrn_radiation_wavelength      0.71073
_diffrn_radiation_type            MoK\a
_diffrn_radiation_source          'fine-focus sealed tube'
_diffrn_radiation_monochromator   graphite
_diffrn_measurement_device_type   'Crystal Logic Dual Goniometer'
_diffrn_measurement_method        '\q/2\q'
_diffrn_detector_area_resol_mean  ?
_diffrn_standards_number          3
_diffrn_standards_interval_count  97
_diffrn_standards_interval_time   ?
_diffrn_standards_decay_%         2.9
_diffrn_reflns_number             4896
_diffrn_reflns_av_R_equivalents   0.0266
_diffrn_reflns_av_sigmaI/netI     0.0522
_diffrn_reflns_limit_h_min        0
_diffrn_reflns_limit_h_max        40
_diffrn_reflns_limit_k_min        0
_diffrn_reflns_limit_k_max        43
_diffrn_reflns_limit_l_min        0
_diffrn_reflns_limit_l_max        9
_diffrn_reflns_theta_min          2.36
_diffrn_reflns_theta_max          23.50
_reflns_number_total              4770
_reflns_number_gt                 3404
_reflns_threshold_expression      >2sigma(I)
 
_computing_data_collection        ?
_computing_cell_refinement        ?
_computing_data_reduction         ?
_computing_structure_solution     'SHELXS-86 (Sheldrick, 1986)'
_computing_structure_refinement   'SHELXL-97 (Sheldrick, 1997)'
_computing_molecular_graphics     ?
_computing_publication_material   ?
 
_refine_special_details
;
 Refinement of F^2^ against ALL reflections.  The weighted R-factor wR and
 goodness of fit S are based on F^2^, conventional R-factors R are based
 on F, with F set to zero for negative F^2^. The threshold expression of
 F^2^ > 2sigma(F^2^) is used only for calculating R-factors(gt) etc. and is
 not relevant to the choice of reflections for refinement.  R-factors based
 on F^2^ are statistically about twice as large as those based on F, and R-
 factors based on ALL data will be even larger.
;
 
_refine_ls_structure_factor_coef  Fsqd
_refine_ls_matrix_type            full
_refine_ls_weighting_scheme       calc
_refine_ls_weighting_details
 'calc w=1/[\s^2^(Fo^2^)+(0.0000P)^2^+124.4672P] where P=(Fo^2^+2Fc^2^)/3'
_atom_sites_solution_primary      direct
_atom_sites_solution_secondary    difmap
_atom_sites_solution_hydrogens    geom
_refine_ls_hydrogen_treatment     mixed
_refine_ls_extinction_method      none
_refine_ls_extinction_coef        ?
_refine_ls_number_reflns          4770
_refine_ls_number_parameters      498
_refine_ls_number_restraints      0
_refine_ls_R_factor_all           0.0660
_refine_ls_R_factor_gt            0.0410
_refine_ls_wR_factor_ref          0.1121
_refine_ls_wR_factor_gt           0.0937
_refine_ls_goodness_of_fit_ref    1.093
_refine_ls_restrained_S_all       1.093
_refine_ls_shift/su_max           0.017
_refine_ls_shift/su_mean          0.001
 
loop_
 _atom_site_label
 _atom_site_type_symbol
 _atom_site_fract_x
 _atom_site_fract_y
 _atom_site_fract_z
 _atom_site_U_iso_or_equiv
 _atom_site_adp_type
 _atom_site_occupancy
 _atom_site_symmetry_multiplicity
 _atom_site_calc_flag
 _atom_site_refinement_flags
 _atom_site_disorder_assembly
 _atom_site_disorder_group
Re Re 0.845653(9) 0.321099(9) 0.37510(4) 0.05870(15) Uani 1 1 d . . .
S2 S 0.80527(7) 0.28872(7) 0.2423(3) 0.0758(7) Uani 1 1 d . . .
S3 S 0.86285(6) 0.26873(6) 0.4939(3) 0.0692(6) Uani 1 1 d . . .
S4 S 0.80453(7) 0.36530(7) 0.3181(3) 0.0818(7) Uani 1 1 d . . .
O1 O 0.87639(17) 0.32780(17) 0.2432(7) 0.0812(19) Uani 1 1 d . . .
N1 N 0.87977(17) 0.35329(17) 0.5181(7) 0.0563(16) Uani 1 1 d . . .
N2 N 0.82040(16) 0.32841(17) 0.6073(7) 0.0545(16) Uani 1 1 d . . .
S1 S 0.82027(6) 0.34942(7) 0.8841(3) 0.0733(6) Uani 1 1 d . . .
C1 C 0.9110(2) 0.3665(2) 0.4699(12) 0.068(2) Uani 1 1 d . . .
C2 C 0.9331(3) 0.3834(3) 0.5581(13) 0.073(3) Uani 1 1 d . . .
C3 C 0.9255(3) 0.3884(3) 0.7090(13) 0.076(3) Uani 1 1 d . . .
C4 C 0.8939(3) 0.3762(2) 0.7621(13) 0.068(3) Uani 1 1 d . . .
C5 C 0.8722(2) 0.3591(2) 0.6652(9) 0.055(2) Uani 1 1 d . . .
C6 C 0.8380(2) 0.3454(2) 0.7075(9) 0.0527(19) Uani 1 1 d . . .
C7 C 0.7888(2) 0.3168(2) 0.6674(9) 0.057(2) Uani 1 1 d . . .
C8 C 0.7627(2) 0.2985(3) 0.5930(12) 0.077(3) Uani 1 1 d . . .
C9 C 0.7329(3) 0.2901(3) 0.6733(14) 0.086(3) Uani 1 1 d . . .
C10 C 0.7300(3) 0.2984(4) 0.8224(16) 0.101(4) Uani 1 1 d . . .
C11 C 0.7546(3) 0.3164(3) 0.9017(12) 0.084(3) Uani 1 1 d . . .
C12 C 0.7845(2) 0.3261(2) 0.8203(10) 0.066(2) Uani 1 1 d . . .
C13 C 0.8152(2) 0.2435(2) 0.2274(10) 0.068(2) Uani 1 1 d . . .
C14 C 0.7893(3) 0.2191(3) 0.2558(12) 0.072(3) Uani 1 1 d . . .
C15 C 0.7948(3) 0.1840(3) 0.2298(11) 0.073(3) Uani 1 1 d . . .
C16 C 0.8259(3) 0.1726(3) 0.1747(10) 0.074(3) Uani 1 1 d . . .
C17 C 0.8526(3) 0.1958(3) 0.1482(12) 0.089(3) Uani 1 1 d . . .
C18 C 0.8469(3) 0.2299(3) 0.1737(11) 0.086(3) Uani 1 1 d . . .
C19 C 0.8096(4) 0.1128(4) 0.1947(19) 0.110(4) Uani 1 1 d . . .
O2 O 0.8341(2) 0.13821(19) 0.1484(8) 0.093(2) Uani 1 1 d . . .
C20 C 0.8901(2) 0.2793(2) 0.6485(10) 0.065(2) Uani 1 1 d . . .
C21 C 0.8778(3) 0.2782(2) 0.7953(11) 0.069(2) Uani 1 1 d . . .
C22 C 0.8997(3) 0.2870(3) 0.9166(13) 0.075(3) Uani 1 1 d . . .
C23 C 0.9342(3) 0.2951(2) 0.8913(11) 0.069(2) Uani 1 1 d . . .
C24 C 0.9465(3) 0.2957(3) 0.7456(13) 0.075(3) Uani 1 1 d . . .
C25 C 0.9251(3) 0.2877(2) 0.6258(12) 0.069(2) Uani 1 1 d . . .
C26 C 0.9884(5) 0.3069(5) 0.996(2) 0.104(7) Uani 0.69(2) 1 d P . .
C26* C 0.9510(9) 0.3005(9) 1.171(4) 0.087(13) Uani 0.31(2) 1 d P . .
O3 O 0.9545(2) 0.3033(2) 1.0139(8) 0.103(2) Uani 1 1 d . . .
C27 C 0.8111(3) 0.4012(2) 0.4412(12) 0.078(3) Uani 1 1 d . . .
C28 C 0.8401(3) 0.4216(3) 0.4372(15) 0.084(3) Uani 1 1 d . . .
C29 C 0.8441(4) 0.4495(3) 0.5356(16) 0.100(4) Uani 1 1 d . . .
H29 H 0.8640 0.4631 0.5325 0.08(3) Uiso 1 1 calc R . .
C30 C 0.8180(5) 0.4566(3) 0.6380(15) 0.107(4) Uani 1 1 d . . .
C31 C 0.7888(4) 0.4366(4) 0.6419(17) 0.114(4) Uani 1 1 d . . .
C32 C 0.7855(4) 0.4094(3) 0.5436(15) 0.092(3) Uani 1 1 d . . .
O4 O 0.8274(6) 0.4849(4) 0.7291(17) 0.204(8) Uani 1 1 d . . .
C33 C 0.8110(9) 0.4963(6) 0.820(3) 0.29(2) Uani 1 1 d . . .
H33A H 0.8219 0.5169 0.8582 0.18(4) Uiso 1 1 calc R . .
H33B H 0.8083 0.4797 0.8999 0.18(4) Uiso 1 1 calc R . .
H33C H 0.7886 0.5021 0.7791 0.18(4) Uiso 1 1 calc R . .
H1 H 0.9135(18) 0.3621(18) 0.375(8) 0.04(2) Uiso 1 1 d . . .
H2 H 0.952(2) 0.392(2) 0.535(11) 0.08(3) Uiso 1 1 d . . .
H3 H 0.941(2) 0.398(2) 0.773(11) 0.08(3) Uiso 1 1 d . . .
H4 H 0.888(2) 0.378(2) 0.854(10) 0.07(3) Uiso 1 1 d . . .
H8 H 0.765(2) 0.291(2) 0.485(10) 0.07(3) Uiso 1 1 d . . .
H9 H 0.717(3) 0.276(2) 0.611(10) 0.09(3) Uiso 1 1 d . . .
H10 H 0.712(2) 0.293(2) 0.871(9) 0.06(2) Uiso 1 1 d . . .
H11 H 0.7545(17) 0.3279(17) 1.018(8) 0.047(19) Uiso 1 1 d . . .
H14 H 0.771(2) 0.226(2) 0.286(9) 0.05(3) Uiso 1 1 d . . .
H15 H 0.775(2) 0.172(2) 0.248(10) 0.08(3) Uiso 1 1 d . . .
H17 H 0.874(3) 0.190(3) 0.106(12) 0.10(4) Uiso 1 1 d . . .
H18 H 0.8666(17) 0.2425(16) 0.144(7) 0.035(17) Uiso 1 1 d . . .
H19A H 0.805(3) 0.114(3) 0.315(14) 0.11(4) Uiso 1 1 d . . .
H19B H 0.785(3) 0.116(3) 0.125(14) 0.14(5) Uiso 1 1 d . . .
H19C H 0.819(3) 0.087(3) 0.183(11) 0.10(3) Uiso 1 1 d . . .
H21 H 0.855(3) 0.274(3) 0.828(12) 0.11(4) Uiso 1 1 d . . .
H22 H 0.888(3) 0.289(3) 1.012(13) 0.11(4) Uiso 1 1 d . . .
H24 H 0.967(2) 0.302(2) 0.727(10) 0.06(3) Uiso 1 1 d . . .
H25 H 0.9332(17) 0.2914(17) 0.527(8) 0.038(19) Uiso 1 1 d . . .
H28 H 0.855(2) 0.418(2) 0.375(9) 0.05(3) Uiso 1 1 d . . .
H31 H 0.768(2) 0.439(2) 0.710(11) 0.08(3) Uiso 1 1 d . . .
H32 H 0.766(2) 0.398(2) 0.554(10) 0.06(3) Uiso 1 1 d . . .
 
loop_
 _atom_site_aniso_label
 _atom_site_aniso_U_11
 _atom_site_aniso_U_22
 _atom_site_aniso_U_33
 _atom_site_aniso_U_23
 _atom_site_aniso_U_13
 _atom_site_aniso_U_12
Re 0.0627(2) 0.0658(2) 0.0476(2) -0.00312(17) 0.00753(16) -0.01489(16)
S2 0.0822(16) 0.0818(16) 0.0636(14) 0.0022(13) -0.0101(13) -0.0253(13)
S3 0.0726(15) 0.0626(14) 0.0723(15) -0.0109(12) -0.0035(12) -0.0024(11)
S4 0.0937(19) 0.0835(17) 0.0683(15) 0.0099(13) -0.0100(14) -0.0046(14)
O1 0.093(5) 0.090(5) 0.061(4) -0.017(3) 0.023(3) -0.026(4)
N1 0.058(4) 0.059(4) 0.052(4) -0.002(3) 0.007(3) -0.006(3)
N2 0.052(4) 0.059(4) 0.052(4) 0.003(3) 0.008(3) -0.002(3)
S1 0.0670(14) 0.0959(18) 0.0568(13) -0.0110(13) 0.0114(12) -0.0039(12)
C1 0.069(6) 0.072(6) 0.063(7) -0.005(5) 0.011(5) -0.012(5)
C2 0.057(6) 0.074(6) 0.086(8) -0.006(5) 0.006(5) -0.024(5)
C3 0.081(7) 0.069(6) 0.079(8) -0.011(5) -0.015(6) -0.015(5)
C4 0.069(6) 0.066(6) 0.069(7) -0.012(5) 0.011(5) -0.008(5)
C5 0.055(5) 0.046(4) 0.063(5) -0.010(4) 0.002(4) -0.004(4)
C6 0.047(4) 0.058(5) 0.053(5) -0.004(4) 0.005(4) -0.001(4)
C7 0.044(4) 0.066(5) 0.060(5) 0.017(4) 0.004(4) -0.005(4)
C8 0.061(6) 0.103(8) 0.067(7) 0.017(6) 0.000(5) -0.020(5)
C9 0.053(6) 0.117(9) 0.086(8) 0.018(7) -0.003(6) -0.019(6)
C10 0.050(6) 0.153(12) 0.100(10) 0.039(8) 0.014(7) -0.009(7)
C11 0.054(6) 0.132(9) 0.065(7) 0.010(6) 0.015(5) 0.002(6)
C12 0.055(5) 0.089(7) 0.053(5) 0.004(5) 0.007(4) 0.008(5)
C13 0.074(6) 0.076(6) 0.053(5) -0.001(4) -0.003(5) -0.024(5)
C14 0.060(6) 0.086(8) 0.072(6) 0.002(5) 0.001(5) -0.017(6)
C15 0.062(6) 0.084(7) 0.072(6) 0.013(5) -0.014(5) -0.020(6)
C16 0.079(7) 0.094(8) 0.050(5) -0.021(5) 0.003(5) -0.016(6)
C17 0.086(8) 0.110(9) 0.072(7) -0.033(6) 0.025(6) -0.022(7)
C18 0.085(8) 0.106(9) 0.065(6) -0.012(6) 0.023(6) -0.046(7)
C19 0.128(12) 0.083(9) 0.119(12) -0.004(8) -0.001(10) -0.016(8)
O2 0.110(6) 0.084(5) 0.085(5) -0.027(4) 0.013(4) -0.016(4)
C20 0.066(6) 0.057(5) 0.071(6) 0.000(4) 0.002(5) 0.004(4)
C21 0.077(7) 0.060(6) 0.069(6) -0.003(5) 0.010(5) -0.005(5)
C22 0.088(8) 0.065(6) 0.073(7) 0.005(5) 0.013(6) -0.009(5)
C23 0.077(6) 0.054(5) 0.076(7) 0.013(5) -0.007(6) -0.012(4)
C24 0.059(6) 0.072(6) 0.094(8) 0.010(6) -0.003(6) -0.010(5)
C25 0.075(6) 0.061(5) 0.072(7) 0.004(5) 0.010(6) -0.003(5)
C26 0.085(13) 0.115(14) 0.112(14) 0.009(11) -0.040(11) -0.027(10)
C26* 0.10(3) 0.09(2) 0.08(3) 0.017(18) -0.008(19) -0.030(19)
O3 0.126(7) 0.103(6) 0.079(5) 0.025(4) -0.031(5) -0.034(5)
C27 0.092(7) 0.067(6) 0.075(6) 0.014(5) 0.004(6) 0.002(6)
C28 0.087(8) 0.078(8) 0.086(8) 0.022(6) 0.013(7) -0.004(6)
C29 0.114(10) 0.071(7) 0.116(10) 0.018(7) -0.024(8) -0.015(7)
C30 0.162(14) 0.073(8) 0.087(9) -0.007(7) -0.011(9) 0.022(9)
C31 0.128(12) 0.100(10) 0.113(11) 0.005(9) 0.033(10) 0.001(9)
C32 0.096(9) 0.077(8) 0.102(9) 0.004(7) 0.020(8) -0.002(7)
O4 0.36(2) 0.119(11) 0.133(11) -0.022(8) -0.009(12) 0.088(12)
C33 0.47(6) 0.110(18) 0.30(4) -0.01(2) -0.18(5) 0.08(2)
 
_geom_special_details
;
 All esds (except the esd in the dihedral angle between two l.s. planes)
 are estimated using the full covariance matrix.  The cell esds are taken
 into account individually in the estimation of esds in distances, angles
 and torsion angles; correlations between esds in cell parameters are only
 used when they are defined by crystal symmetry.  An approximate (isotropic)
 treatment of cell esds is used for estimating esds involving l.s. planes.
;
 
loop_
 _geom_bond_atom_site_label_1
 _geom_bond_atom_site_label_2
 _geom_bond_distance
 _geom_bond_site_symmetry_2
 _geom_bond_publ_flag
Re O1 1.681(6) . ?
Re N1 2.203(7) . ?
Re N2 2.288(6) . ?
Re S2 2.312(2) . ?
Re S3 2.367(3) . ?
Re S4 2.377(3) . ?
S2 C13 1.787(10) . ?
S3 C20 1.770(9) . ?
S4 C27 1.776(11) . ?
N1 C5 1.351(10) . ?
N1 C1 1.371(11) . ?
N2 C6 1.291(10) . ?
N2 C7 1.401(10) . ?
S1 C6 1.710(8) . ?
S1 C12 1.736(9) . ?
C1 C2 1.325(13) . ?
C2 C3 1.378(14) . ?
C3 C4 1.384(14) . ?
C4 C5 1.363(12) . ?
C5 C6 1.468(11) . ?
C7 C8 1.390(13) . ?
C7 C12 1.408(11) . ?
C8 C9 1.385(14) . ?
C9 C10 1.361(16) . ?
C10 C11 1.367(17) . ?
C11 C12 1.408(12) . ?
C13 C14 1.392(12) . ?
C13 C18 1.407(14) . ?
C14 C15 1.386(14) . ?
C15 C16 1.364(13) . ?
C16 O2 1.381(12) . ?
C16 C17 1.381(14) . ?
C17 C18 1.348(16) . ?
C19 O2 1.417(15) . ?
C20 C21 1.382(13) . ?
C20 C25 1.400(13) . ?
C21 C22 1.406(14) . ?
C22 C23 1.381(14) . ?
C23 C24 1.372(14) . ?
C23 O3 1.373(11) . ?
C24 C25 1.375(14) . ?
C26 O3 1.321(17) . ?
C26* O3 1.40(3) . ?
C27 C28 1.368(15) . ?
C27 C32 1.372(15) . ?
C28 C29 1.388(16) . ?
C29 C30 1.377(17) . ?
C30 C31 1.362(19) . ?
C30 O4 1.402(19) . ?
C31 C32 1.366(18) . ?
O4 C33 1.11(3) . ?
 
loop_
 _geom_angle_atom_site_label_1
 _geom_angle_atom_site_label_2
 _geom_angle_atom_site_label_3
 _geom_angle
 _geom_angle_site_symmetry_1
 _geom_angle_site_symmetry_3
 _geom_angle_publ_flag
O1 Re N1 83.8(3) . . ?
O1 Re N2 154.4(3) . . ?
N1 Re N2 70.7(2) . . ?
O1 Re S2 101.7(2) . . ?
N1 Re S2 174.07(18) . . ?
N2 Re S2 103.67(18) . . ?
O1 Re S3 104.0(3) . . ?
N1 Re S3 93.30(18) . . ?
N2 Re S3 79.93(17) . . ?
S2 Re S3 87.38(9) . . ?
O1 Re S4 102.2(3) . . ?
N1 Re S4 96.66(18) . . ?
N2 Re S4 79.61(17) . . ?
S2 Re S4 80.25(10) . . ?
S3 Re S4 152.80(9) . . ?
C13 S2 Re 114.7(3) . . ?
C20 S3 Re 108.2(3) . . ?
C27 S4 Re 109.4(3) . . ?
C5 N1 C1 115.2(7) . . ?
C5 N1 Re 121.1(5) . . ?
C1 N1 Re 123.4(6) . . ?
C6 N2 C7 110.9(7) . . ?
C6 N2 Re 117.1(5) . . ?
C7 N2 Re 132.0(5) . . ?
C6 S1 C12 88.4(4) . . ?
C2 C1 N1 124.1(10) . . ?
C1 C2 C3 120.1(10) . . ?
C2 C3 C4 117.8(10) . . ?
C5 C4 C3 119.2(10) . . ?
N1 C5 C4 123.5(8) . . ?
N1 C5 C6 112.2(7) . . ?
C4 C5 C6 124.3(8) . . ?
N2 C6 C5 118.5(7) . . ?
N2 C6 S1 117.6(6) . . ?
C5 C6 S1 123.8(6) . . ?
C8 C7 N2 127.5(8) . . ?
C8 C7 C12 119.9(8) . . ?
N2 C7 C12 112.5(8) . . ?
C9 C8 C7 118.2(10) . . ?
C10 C9 C8 120.7(11) . . ?
C9 C10 C11 123.9(11) . . ?
C10 C11 C12 116.1(10) . . ?
C11 C12 C7 121.1(9) . . ?
C11 C12 S1 128.3(8) . . ?
C7 C12 S1 110.6(6) . . ?
C14 C13 C18 115.5(10) . . ?
C14 C13 S2 119.3(8) . . ?
C18 C13 S2 124.9(7) . . ?
C15 C14 C13 121.2(11) . . ?
C16 C15 C14 120.3(10) . . ?
C15 C16 O2 124.6(9) . . ?
C15 C16 C17 120.3(11) . . ?
O2 C16 C17 115.0(10) . . ?
C18 C17 C16 118.7(11) . . ?
C17 C18 C13 123.9(10) . . ?
C16 O2 C19 117.5(10) . . ?
C21 C20 C25 118.2(9) . . ?
C21 C20 S3 120.9(7) . . ?
C25 C20 S3 120.9(7) . . ?
C20 C21 C22 120.1(10) . . ?
C23 C22 C21 120.5(10) . . ?
C24 C23 O3 122.7(9) . . ?
C24 C23 C22 119.2(10) . . ?
O3 C23 C22 118.1(10) . . ?
C23 C24 C25 120.8(10) . . ?
C24 C25 C20 121.1(10) . . ?
C26 O3 C23 119.3(11) . . ?
C26 O3 C26* 102.9(17) . . ?
C23 O3 C26* 135.4(16) . . ?
C28 C27 C32 118.1(11) . . ?
C28 C27 S4 123.2(9) . . ?
C32 C27 S4 118.8(9) . . ?
C27 C28 C29 121.1(12) . . ?
C30 C29 C28 119.1(13) . . ?
C31 C30 C29 120.2(13) . . ?
C31 C30 O4 129.5(17) . . ?
C29 C30 O4 110.2(16) . . ?
C30 C31 C32 119.6(14) . . ?
C31 C32 C27 121.9(13) . . ?
C33 O4 C30 125(3) . . ?
 
_diffrn_measured_fraction_theta_max    0.987
_diffrn_reflns_theta_full              23.50
_diffrn_measured_fraction_theta_full   0.987
_refine_diff_density_max    0.885
_refine_diff_density_min   -1.165
_refine_diff_density_rms    0.098

#===END
